# Supplementary material for: A family of uranium–carboxylic acid hybrid materials: synthesis, structure and mixed-dye selective adsorption
Source: Royal Society of Chemistry journal article supplement (doi:10.1039/c6nj00109b), 2016-01-01
Supplement: c6nj00109b1.pdf [file c6nj00109b1.pdf]

## **A family of Uranium-carboxylic acid hybrid materials: synthesis, structure and mixed-dyes selective adsorption**

*Xue Gao,<sup>a</sup> Jian Song,<sup>a</sup> Li Xian Sun,<sup>b</sup> Yong Heng Xing,<sup>a</sup> Feng Ying Bai<sup>\*a</sup> and Zhan Shi<sup>c</sup>*

**Table S1** Selected bond distances (Å) and angles (°) of complexes **1-4**\*

**Table S2** Hydrogen bond lengths (Å) and angles (°) for complexes **1-4**\*

**Fig. S1** The Solid-state IR spectra of complex **1** at a room temperature.

**Fig. S2** The Solid-state IR spectra of complex **2** at a room temperature.

**Fig. S3** The Solid-state IR spectra of complex **3** at a room temperature.

**Fig. S4** The Solid-state IR spectra of complex **4** at a room temperature.

**Fig. S5** The TG curve for complex **1**.

**Fig. S6** The TG curve for complex **2**.

**Fig. S7** The TG curve for complex **3**.

**Fig. S8** The TG curve for complex **4**.

**Fig. S9** The UV-Vis spectra for complex **1**.

**Fig. S10** The UV-Vis spectra for complex **2**.

**Fig. S11** The UV-Vis spectra for complex **3**.

**Fig. S12** The UV-Vis spectra for complex **4**.

**Fig. S13** PXRD powder patterns: (a) the simulated PXRD pattern calculated from single-crystal structure of complex **1**, (b) the experimental PXRD for complex **1**.

**Fig. S14** PXRD powder patterns: (a) the simulated PXRD pattern calculated from single-crystal structure of complex **2**, (b) the experimental PXRD for complex **2**.

**Fig. S15** PXRD powder patterns: (a) the simulated PXRD pattern calculated from single-crystal structure of complex **3**, (b) the experimental PXRD for complex **3**.

**Fig. S16** PXRD powder patterns: (a) the simulated PXRD pattern calculated from single-crystal structure of complex **4**, (b) the experimental PXRD for complex **4**.

**Table S1** Selected bond distances (Å) and angles (°) of complexes **1-4\***

| Complex 1                                   |            |                                             |            |
|---------------------------------------------|------------|---------------------------------------------|------------|
| U(1)-O(1)                                   | 1.755(3)   | U(1)-O(2)                                   | 1.770(3)   |
| U(1)-O(5)                                   | 2.355(2)   | U(1)-O(6)                                   | 2.363(2)   |
| U(1)-O(7) <sup>#1</sup>                     | 2.364(3)   | U(1)-O(3)                                   | 2.393(2)   |
| U(1)-O(4)                                   | 2.408(3)   |                                             |            |
| O(1)-U(1)-O(2)                              | 179.15(13) | O(1)-U(1)-O(5)                              | 87.95(11)  |
| O(2)-U(1)-O(5)                              | 91.67(11)  | O(1)-U(1)-O(6)                              | 95.35(10)  |
| O(2)-U(1)-O(6)                              | 85.21(10)  | O(5)-U(1)-O(6)                              | 67.76(8)   |
| O(1)-U(1)-O(7) <sup>#1</sup>                | 86.64(11)  | O(2)-U(1)-O(7) <sup>#1</sup>                | 94.12(11)  |
| O(5)-U(1)-O(7) <sup>#1</sup>                | 142.52(9)  | O(6)-U(1)-O(7) <sup>#1</sup>                | 75.87(9)   |
| O(1)-U(1)-O(3)                              | 93.35(11)  | O(2)-U(1)-O(3)                              | 86.49(11)  |
| O(5)-U(1)-O(3)                              | 142.83(9)  | O(6)-U(1)-O(3)                              | 148.56(9)  |
| O(7) <sup>#1</sup> -U(1)-O(3)               | 74.55(9)   | O(1)-U(1)-O(4)                              | 89.41(12)  |
| O(2)-U(1)-O(4)                              | 89.75(12)  | O(5)-U(1)-O(4)                              | 71.24(9)   |
| O(6)-U(1)-O(4)                              | 138.49(9)  | O(7) <sup>#1</sup> -U(1)-O(4)               | 145.64(9)  |
| O(3)-U(1)-O(4)                              | 71.63(9)   |                                             |            |
| Complex 2                                   |            |                                             |            |
| U(1)-O(1)                                   | 1.775(3)   | U(1)-O(1) <sup>#1</sup>                     | 1.775(3)   |
| U(1)-O(2)                                   | 2.452(3)   | U(1)-O(2) <sup>#1</sup>                     | 2.452(2)   |
| U(1)-O(4)                                   | 2.472(3)   | U(1)-O(4) <sup>#1</sup>                     | 2.472(3)   |
| U(1)-O(3)                                   | 2.503(3)   | U(1)-O(3) <sup>#1</sup>                     | 2.503(3)   |
| O(1)-U(1)-O(1) <sup>#1</sup>                | 179.999(1) | O(1)-U(1)-O(2)                              | 92.80(13)  |
| O(1)-U(1)-O(2) <sup>#1</sup>                | 87.20(13)  | O(1) <sup>#1</sup> -U(1)-O(2)               | 87.20(13)  |
| O(1) <sup>#1</sup> -U(1)-O(2) <sup>#1</sup> | 92.80(13)  | O(2)-U(1)-O(2) <sup>#1</sup>                | 180.0      |
| O(1) <sup>#1</sup> -U(1)-O(4) <sup>#1</sup> | 93.60(13)  | O(1)-U(1)-O(4) <sup>#1</sup>                | 86.40(13)  |
| O(2)-U(1)-O(4) <sup>#1</sup>                | 62.80(10)  | O(2) <sup>#1</sup> -U(1)-O(4) <sup>#1</sup> | 117.20(10) |
| O(1) <sup>#1</sup> -U(1)-O(4)               | 86.40(13)  | O(1)-U(1)-O(4)                              | 93.60(13)  |
| O(2)-U(1)-O(4)                              | 117.20(10) | O(2) <sup>#1</sup> -U(1)-O(4)               | 62.80(10)  |
| O(4)-U(1)-O(4) <sup>#1</sup>                | 180.0      | O(1) <sup>#1</sup> -U(1)-O(3) <sup>#1</sup> | 87.77(13)  |
| O(1)-U(1)-O(3) <sup>#1</sup>                | 92.23(13)  | O(2)-U(1)-O(3) <sup>#1</sup>                | 114.15(10) |

|                                             |            |                                             |            |
|---------------------------------------------|------------|---------------------------------------------|------------|
| O(2) <sup>#1</sup> -U(1)-O(3) <sup>#1</sup> | 65.85(10)  | O(4) <sup>#1</sup> -U(1)-O(3) <sup>#1</sup> | 52.12(10)  |
| O(4)-U(1)-O(3) <sup>#1</sup>                | 127.88(10) | O(1) <sup>#1</sup> -U(1)-O(3)               | 92.23(13)  |
| O(1)-U(1)-O(3)                              | 87.76(13)  | O(2)-U(1)-O(3)                              | 65.85(10)  |
| O(2) <sup>#1</sup> -U(1)-O(3)               | 114.15(10) | O(4) <sup>#1</sup> -U(1)-O(3)               | 127.88(10) |
| O(4)-U(1)-O(3)                              | 52.12(10)  | O(3)-U(1)-O(3) <sup>#1</sup>                | 180.0      |

---

**Complex 3**

---

|                |          |                |          |
|----------------|----------|----------------|----------|
| U(1)-O(1)      | 1.755(4) | U(1)-O(2)      | 1.763(4) |
| U(1)-O(8)      | 2.392(5) | U(1)-O(3)      | 2.436(5) |
| U(1)-O(4)      | 2.464(4) | U(1)-O(5)      | 2.477(4) |
| U(1)-O(7)      | 2.493(5) | U(1)-O(6)      | 2.494(5) |
| O(1)-U(1)-O(2) | 178.3(2) | O(1)-U(1)-O(8) | 92.4(2)  |
| O(2)-U(1)-O(8) | 88.7(2)  | O(1)-U(1)-O(3) | 90.8(2)  |
| O(2)-U(1)-O(3) | 90.9(2)  | O(8)-U(1)-O(3) | 67.9(2)  |
| O(1)-U(1)-O(4) | 91.5(2)  | O(2)-U(1)-O(4) | 89.1(2)  |
| O(8)-U(1)-O(4) | 121.2(2) | O(3)-U(1)-O(4) | 53.4(2)  |
| O(1)-U(1)-O(5) | 90.4(2)  | O(2)-U(1)-O(5) | 88.4(2)  |
| O(8)-U(1)-O(5) | 172.4(2) | O(3)-U(1)-O(5) | 119.2(2) |
| O(4)-U(1)-O(5) | 65.8(2)  | O(1)-U(1)-O(7) | 89.5(2)  |
| O(2)-U(1)-O(7) | 90.1(2)  | O(8)-U(1)-O(7) | 52.8(2)  |
| O(3)-U(1)-O(7) | 120.7(2) | O(4)-U(1)-O(7) | 174.0(2) |
| O(5)-U(1)-O(7) | 120.1(2) | O(1)-U(1)-O(6) | 88.2(2)  |
| O(2)-U(1)-O(6) | 90.1(2)  | O(8)-U(1)-O(6) | 121.0(2) |
| O(3)-U(1)-O(6) | 171.1(2) | O(4)-U(1)-O(6) | 117.8(2) |
| O(5)-U(1)-O(6) | 52.0(1)  | O(7)-U(1)-O(6) | 68.2(2)  |

---

**Complex 4**

---

|                         |          |                         |          |
|-------------------------|----------|-------------------------|----------|
| U(1)-O(1)               | 1.768(5) | U(1)-O(2)               | 1.772(5) |
| U(1)-O(6)               | 2.289(5) | U(1)-O(5)               | 2.306(5) |
| U(1)-O(8)               | 2.460(5) | U(1)-O(12)              | 2.482(5) |
| U(1)-O(7)               | 2.487(5) | U(2)-O(4)               | 1.762(5) |
| U(2)-O(3)               | 1.769(5) | U(2)-O(5) <sup>#1</sup> | 2.296(5) |
| U(2)-O(6) <sup>#2</sup> | 2.308(5) | U(2)-O(9)               | 2.468(5) |

|                                             |            |                                |            |
|---------------------------------------------|------------|--------------------------------|------------|
| U(2)-O(11)                                  | 2.479(5)   | U(2)-O(10)                     | 2.487(5)   |
| O(1)-U(1)-O(2)                              | 178.1(2)   | O(1)-U(1)-O(6)                 | 86.9(2)    |
| O(2)-U(1)-O(6)                              | 92.9(2)    | O(1)-U(1)-O(5)                 | 94.9(2)    |
| O(2)-U(1)-O(5)                              | 87.0(2)    | O(6)-U(1)-O(5)                 | 83.50(17)  |
| O(1)-U(1)-O(8)                              | 89.9(2)    | O(2)-U(1)-O(8)                 | 89.1(2)    |
| O(6)-U(1)-O(8)                              | 142.53(17) | O(5)-U(1)-O(8)                 | 133.96(16) |
| O(1)-U(1)-O(12)                             | 94.6(2)    | O(2)-U(1)-O(12)                | 83.6(2)    |
| O(6)-U(1)-O(12)                             | 74.64(17)  | O(5)-U(1)-O(12)                | 155.62(17) |
| O(8)-U(1)-O(12)                             | 68.43(16)  | O(1)-U(1)-O(7)                 | 86.9(2)    |
| O(2)-U(1)-O(7)                              | 94.1(2)    | O(6)-U(1)-O(7)                 | 152.03(17) |
| O(5)-U(1)-O(7)                              | 69.91(16)  | O(8)-U(1)-O(7)                 | 64.66(15)  |
| O(12)-U(1)-O(7)                             | 133.06(16) | O(4)-U(2)-O(3)                 | 179.7(2)   |
| O(4)-U(2)-O(5) <sup>#1</sup>                | 89.1(2)    | O(3)-U(2)-O(5) <sup>#1</sup>   | 90.7(2)    |
| O(4)-U(2)-O(6) <sup>#2</sup>                | 90.5(2)    | O(3)-U(2)-O(6) <sup>#2</sup>   | 89.7(2)    |
| O(5) <sup>#1</sup> -U(2)-O(6) <sup>#2</sup> | 81.39(17)  | O(4)-U(2)-O(9)                 | 87.7(2)    |
| O(3)-U(2)-O(9)                              | 92.6(2)    | O(5) <sup>#1</sup> -U(2)-O(9)  | 154.44(16) |
| O(6) <sup>#2</sup> -U(2)-O(9)               | 73.29(17)  | O(4)-U(2)-O(11)                | 85.9(2)    |
| O(3)-U(2)-O(11)                             | 93.8(2)    | O(5) <sup>#1</sup> -U(2)-O(11) | 73.09(16)  |
| O(6) <sup>#2</sup> -U(2)-O(11)              | 154.27(17) | O(9)-U(2)-O(11)                | 131.86(16) |
| O(4)-U(2)-O(10)                             | 91.3(2)    | O(3)-U(2)-O(10)                | 88.8(2)    |
| O(5) <sup>#1</sup> -U(2)-O(10)              | 140.18(16) | O(6) <sup>#2</sup> -U(2)-O(10) | 138.41(17) |
| O(9)-U(2)-O(10)                             | 65.28(15)  | O(11)-U(2)-O(10)               | 67.22(16)  |

---

\*Symmetry transformations used to generate equivalent atoms: complex 1: #1: -x+2, -y, -z; complex 2: #1: -x+1, -y+1, -z+1; complex 4: #1: x+1, -y+1/2, z+1/2, #2: -x+1, y-1/2, -z+3/2.

**Table S2** Hydrogen bond lengths (Å) and angles (°) for complexes **1-4\***

| D-H...A                            | d-D(H)/Å | d(H...A)/Å | d(D...A)/Å | ∠D-H...A/° |
|------------------------------------|----------|------------|------------|------------|
| <b>Complex 1</b>                   |          |            |            |            |
| O(4)-H(4B)...O(9)                  | 0.85     | 1.82       | 2.530(4)   | 139.2      |
| N(1)-H(1)...O(8) <sup>#2</sup>     | 0.86     | 1.87       | 2.686(4)   | 157.2      |
| O(4)-H(4A)...O(8) <sup>#3</sup>    | 0.85     | 1.93       | 2.682(4)   | 146.0      |
| C(12)-H(12)...O(2) <sup>#4</sup>   | 0.93     | 2.58       | 3.347(5)   | 139.8      |
| <b>Complex 2</b>                   |          |            |            |            |
| O(2)-H(2A)...O(1) <sup>#2</sup>    | 0.85     | 2.50       | 3.028(4)   | 120.9      |
| <b>Complex 3</b>                   |          |            |            |            |
| N(1)-H(1A)...O(5)                  | 0.90     | 1.87       | 2.757(7)   | 166.3      |
| N(1)-H(1B)...O(2) <sup>#1</sup>    | 0.90     | 2.11       | 2.915(7)   | 148.8      |
| <b>Complex 4</b>                   |          |            |            |            |
| O(1W)-H(1WB)...O(8)                | 0.85     | 1.97       | 2.818(9)   | 175.2      |
| O(1W)-H(1WA)...O(12) <sup>#5</sup> | 0.85     | 2.30       | 3.144(11)  | 173.7      |
| O(12)-H(12A)...O(9) <sup>#4</sup>  | 0.85     | 1.95       | 2.769(7)   | 161.0      |

\*Symmetry transformation used to generate equivalent atoms: complex **1**: #2: -x+1, -y, -z, #3: -x+3/2, y+1/2, -z+1/2, #4: x-1/2, -y-1/2, z-1/2; complex **2**: #2: -x, -y+1, -z+1; complex **3**: #1: x, -y+1/2, z+1/2; complex **4**: #4: -x+1, y+1/2, -z+3/2, #5: x+1, y, z.

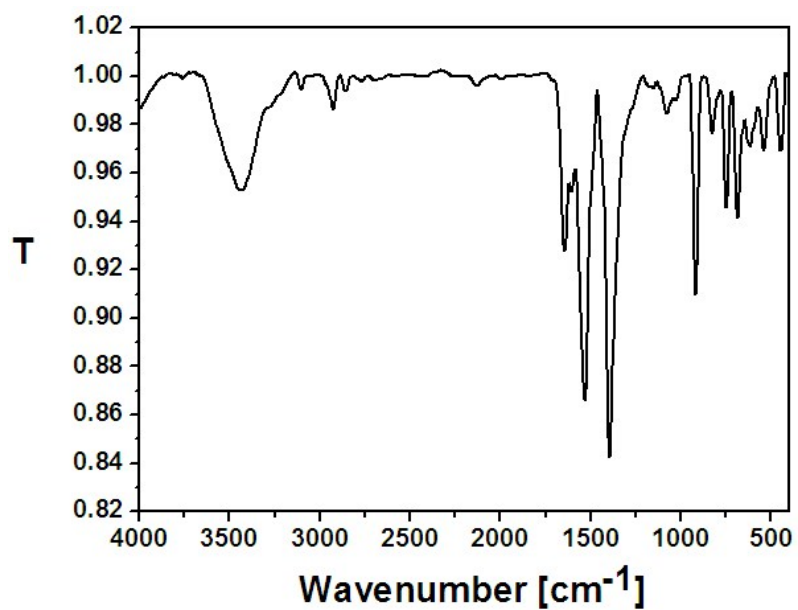

**Fig. S1** The Solid-state IR spectra of complex **1** at a room temperature.

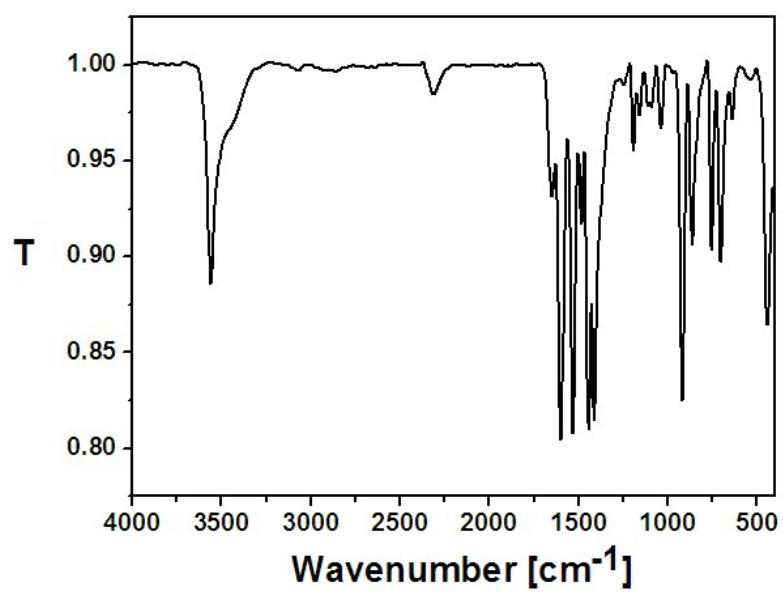

**Fig. S2** The Solid-state IR spectra of complex **2** at a room temperature.

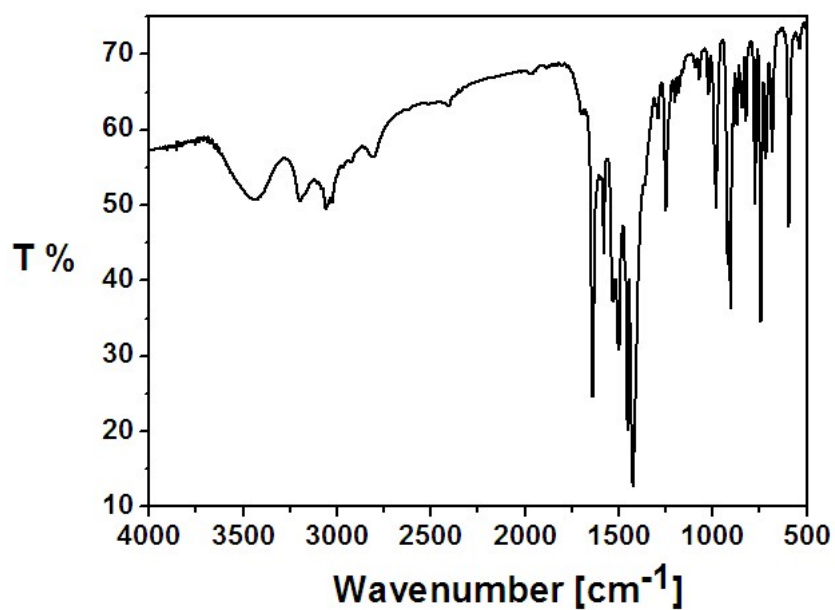

Fig. S3 The Solid-state IR spectra of complex 3 at a room temperature.

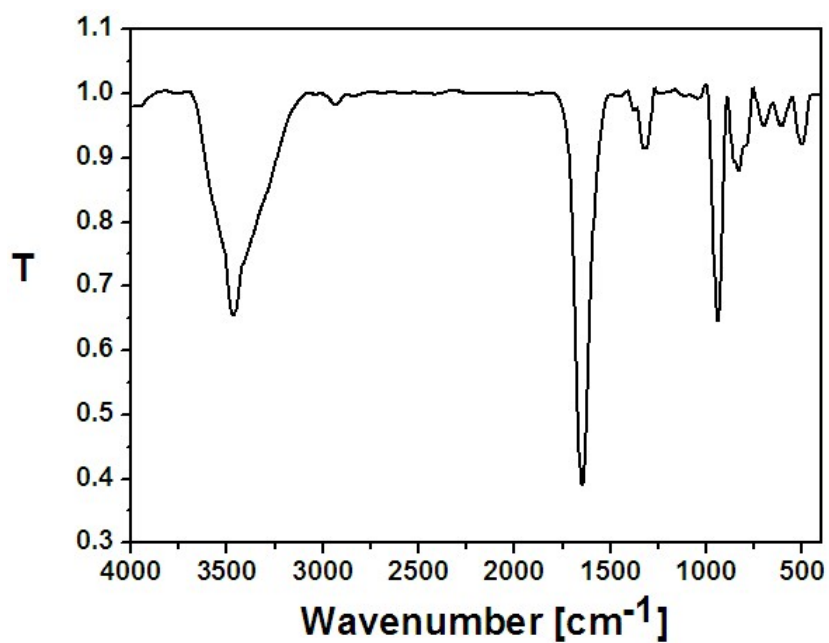

Fig. S4 The Solid-state IR spectra of complex 4 at a room temperature.

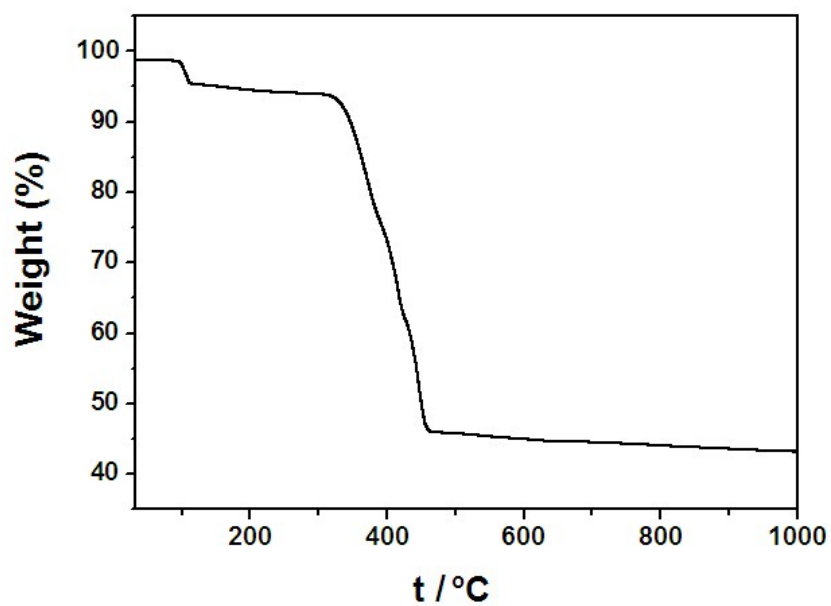

**Fig. S5** The TG curve for complex 1.

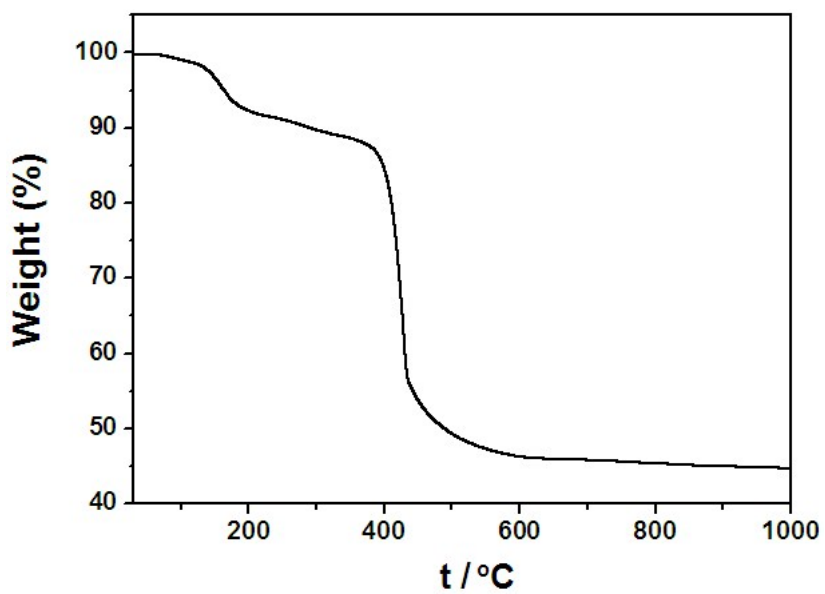

**Fig. S6** The TG curve for complex 2.



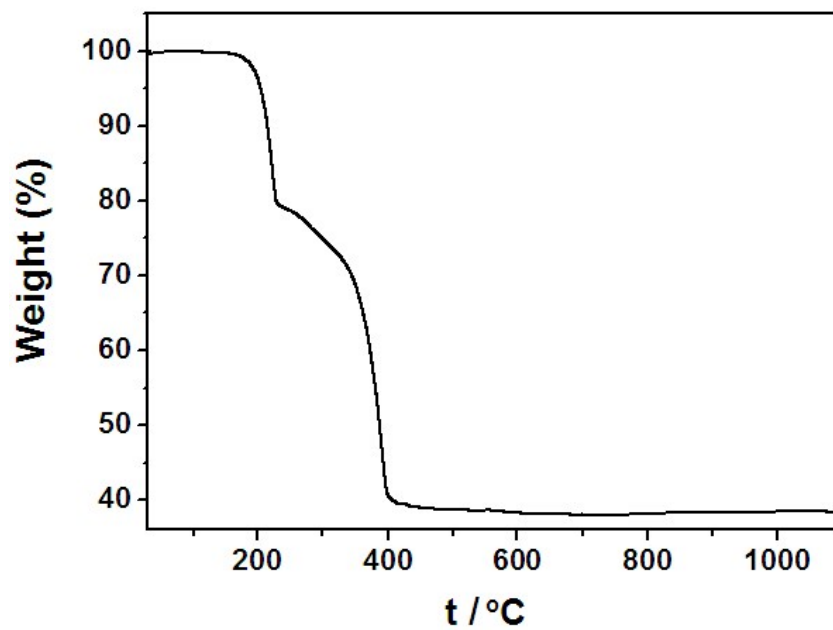

Fig. S7 The TG curve for complex 3.

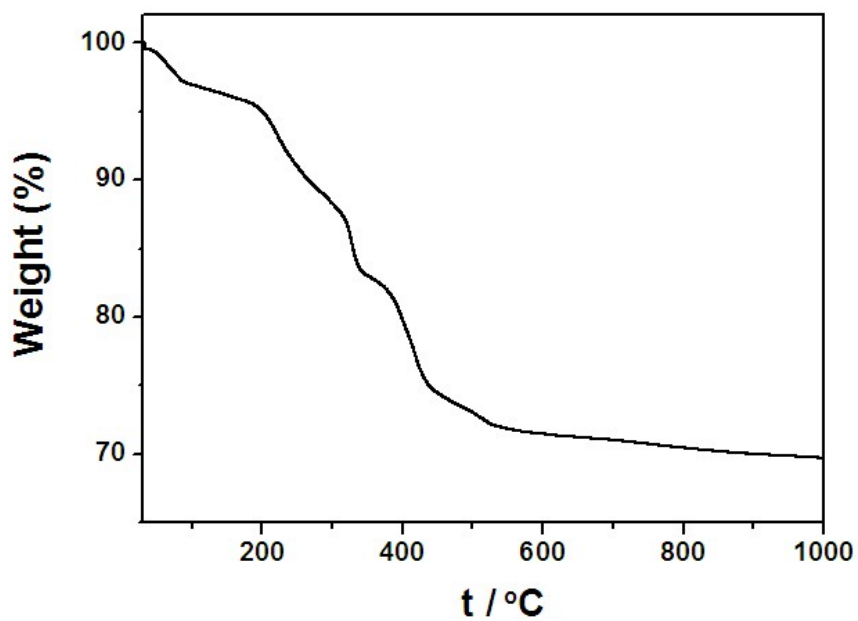

Fig. S8 The TG curve for complex 4.

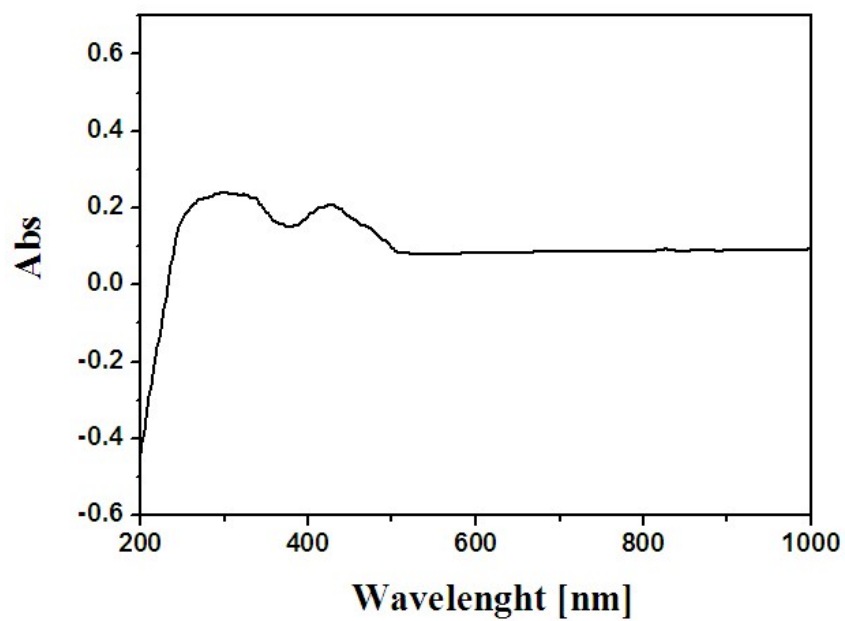

**Fig. S9** The UV-Vis spectra for complex 1.

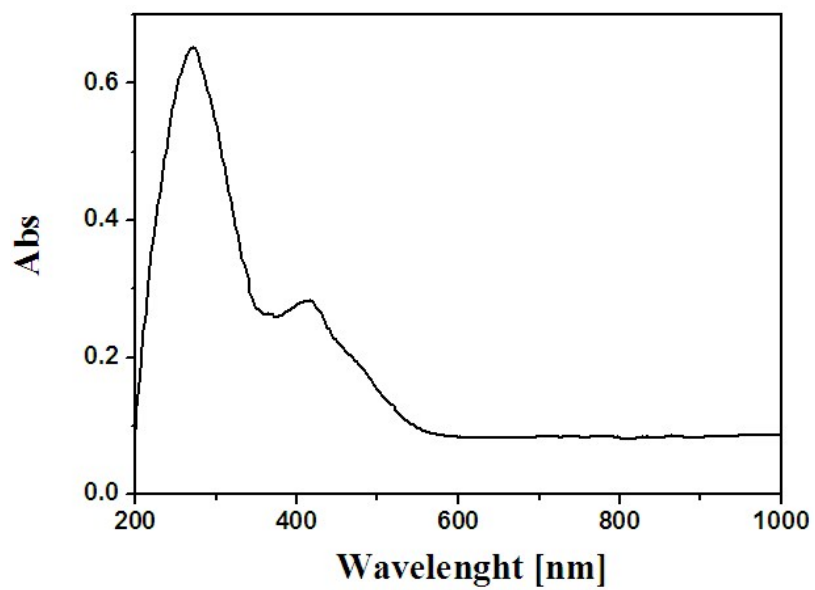

**Fig. S10** The UV-Vis spectra for complex 2.

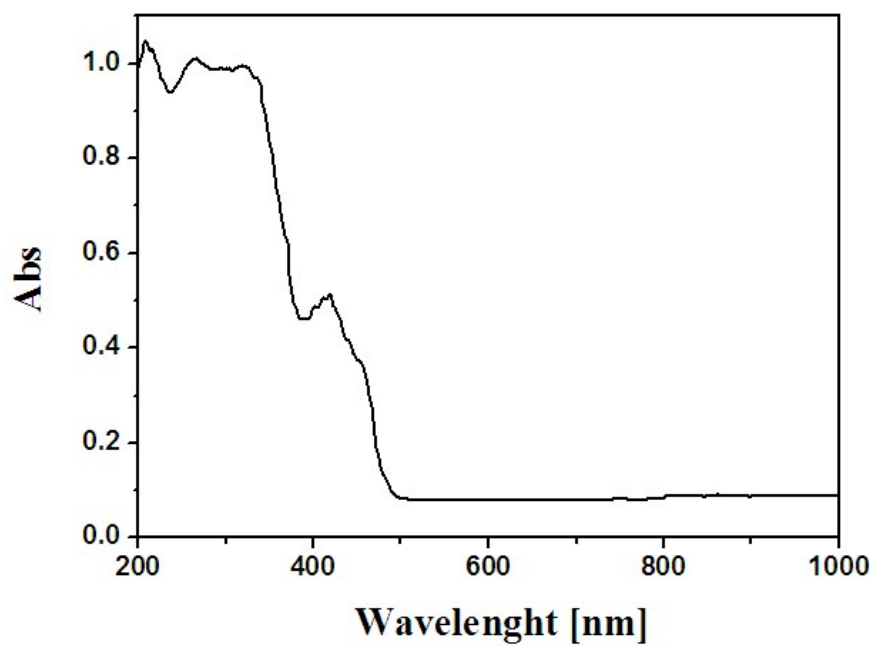

Fig. S11 The UV-Vis spectra for complex 3.

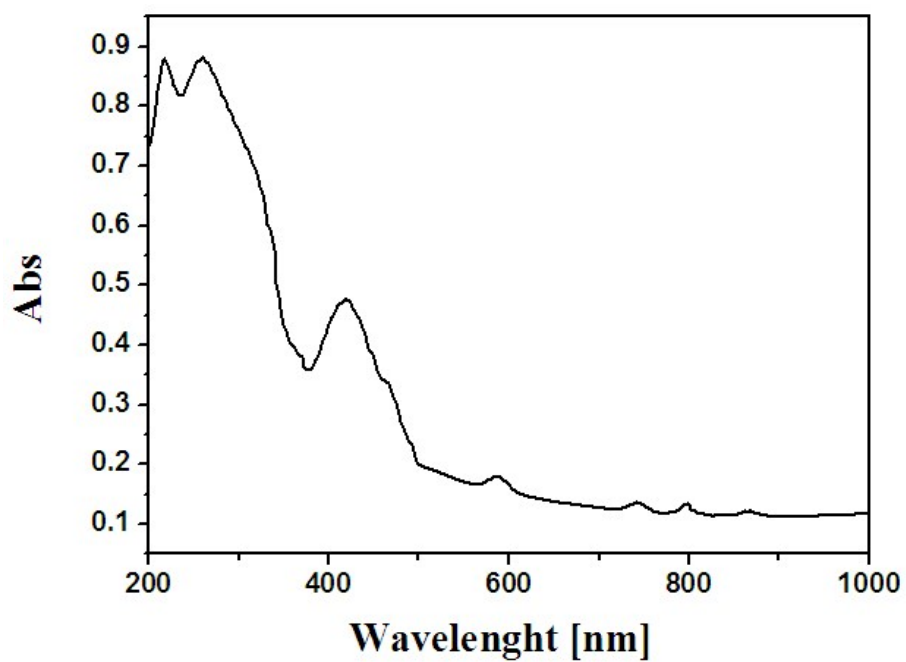

Fig. S12 The UV-Vis spectra for complex 4.

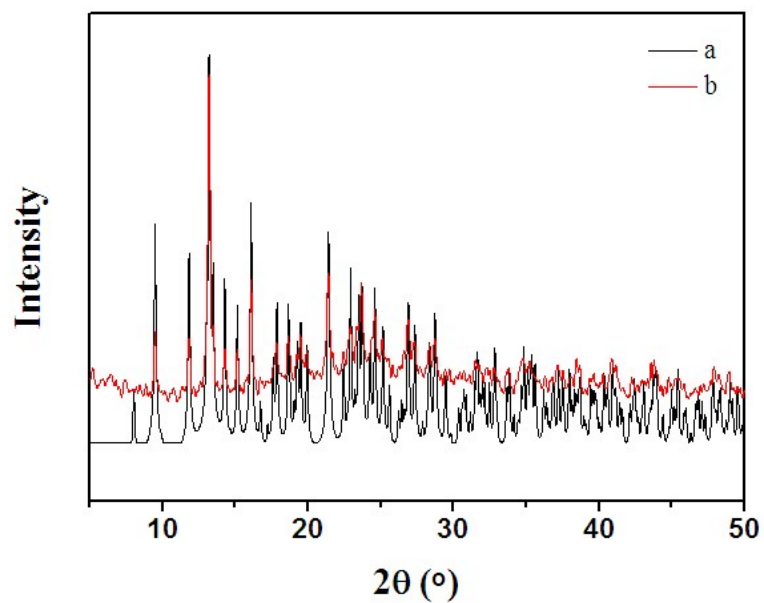

**Fig. S13** PXR D powder patterns: (a) the simulated PXR D pattern calculated from single-crystal structure of complex **1**, (b) the experimental PXR D for complex **1**.

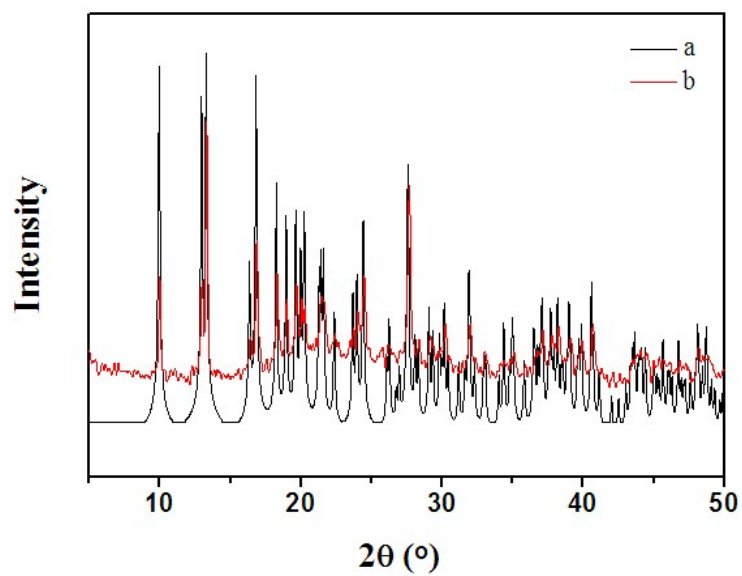

**Fig. S14** PXR D powder patterns: (a) the simulated PXR D pattern calculated from single-crystal structure of complex **2**, (b) the experimental PXR D for complex **2**.

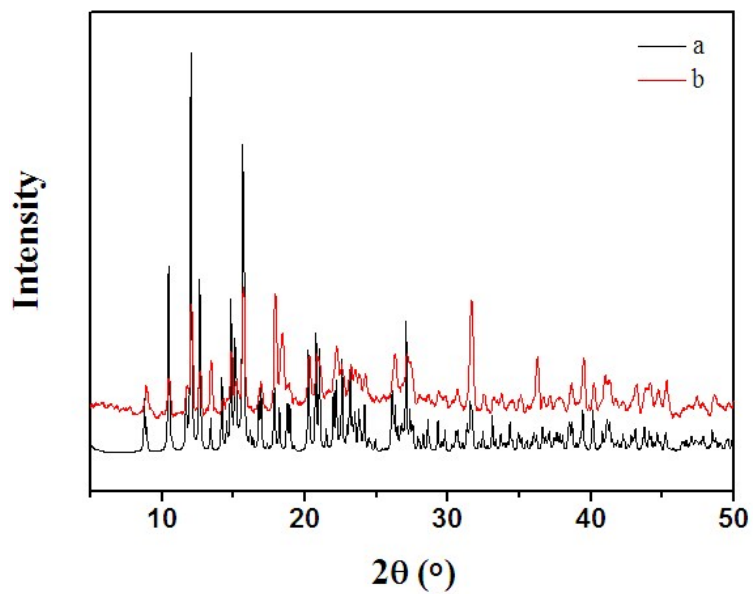

**Fig. S15** PXRD powder patterns: (a) the simulated PXRD pattern calculated from single-crystal structure of complex **3**, (b) the experimental PXRD for complex **3**.

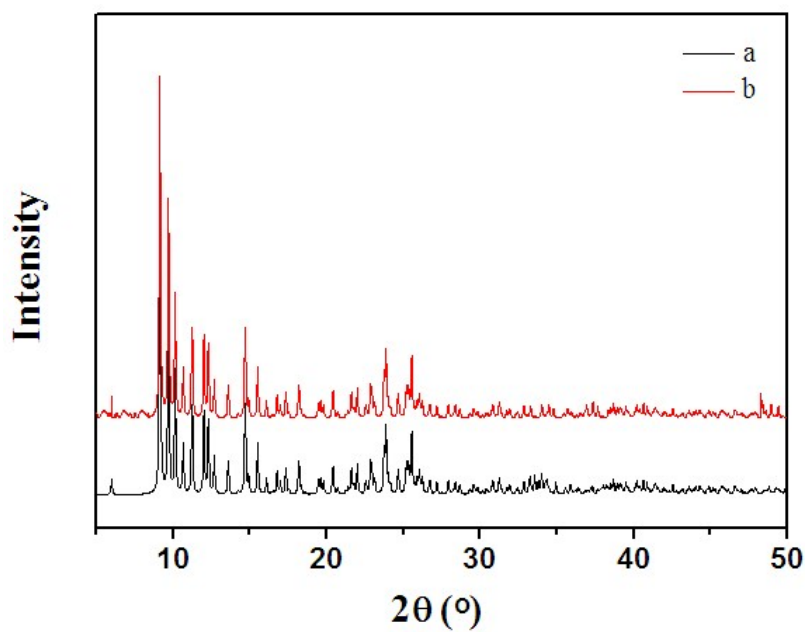

**Fig. S16** PXRD powder patterns: (a) the simulated PXRD pattern calculated from single-crystal structure of complex **4**, (b) the experimental PXRD for complex **4**.
